# Supplementary material
Source: MDPI journal article supplement (https://www.mdpi.com/2079-6412/14/4/389)
Supplement: s1 [file s1]

## Supplementary Information

### Enhancing Uptake Capability of Green Carbon Black Recycled from Scrap Tires for Water Purification

Jiho Choi,<sup>1</sup> Jihyun Kang,<sup>1</sup> Huiseong Yang,<sup>1</sup> Sangin Yoon,<sup>1</sup> Jun-Hyun Kim,<sup>1,2,\*</sup> and Hyun-Ho Park<sup>1,\*</sup>

<sup>1</sup> Department of Chemistry, Keimyung University, Daegu 42601, South Korea; wlh5090@naver.com (J.C.); kgh8465@gmail.com (J.K.); yhsung7771@naver.com (H.Y.); ydain10@gmail.com (S.Y.); rubchem@kmu.ac.kr (H.-H.P.)

<sup>2</sup> Department of Chemistry, Illinois State University, Normal, Illinois 61790-4160, USA; jkim5@ilstu.edu

\* Correspondence: rubchem@kmu.ac.kr (H.-H.P.); jkim5@ilstu.edu (J.-H.K.)

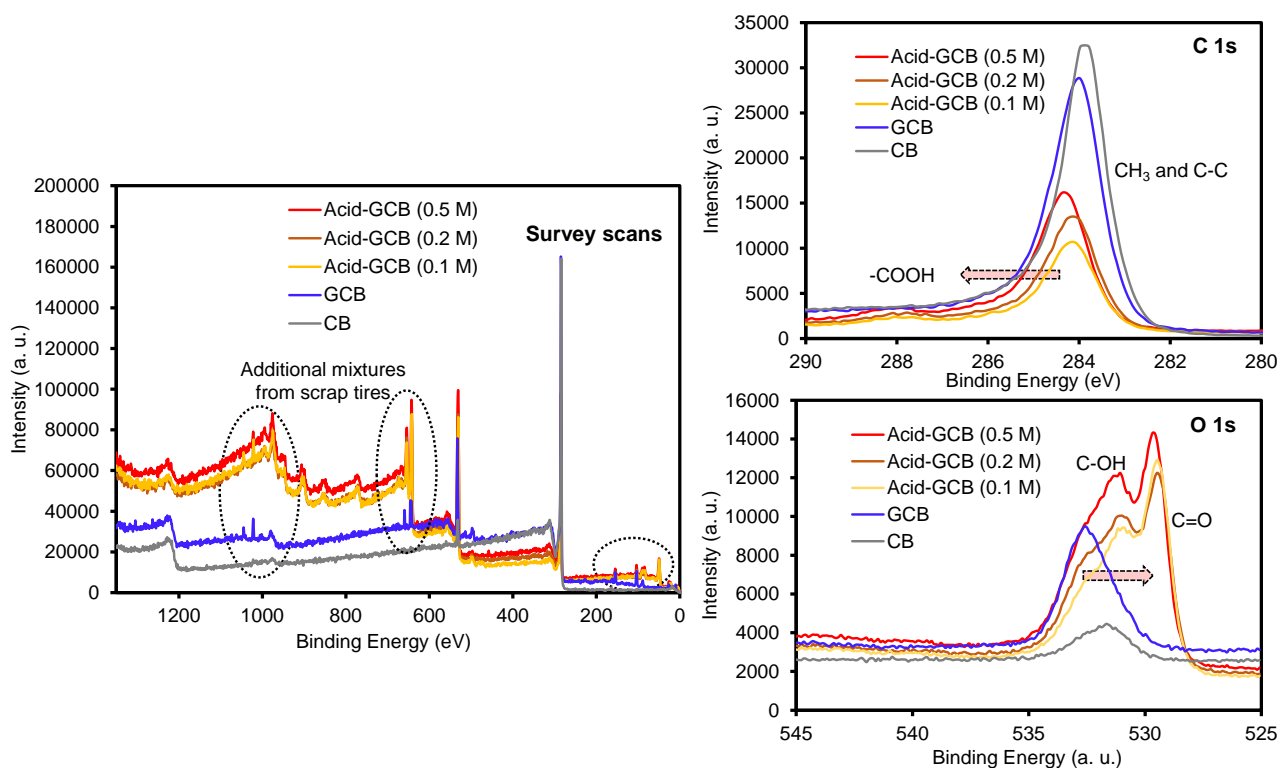

**Figure S1.** XPS survey and detail scans of CB, GCB, and acid-treated GCB (0.1 M, 0.2 M, and 0.5 M acetic acid).

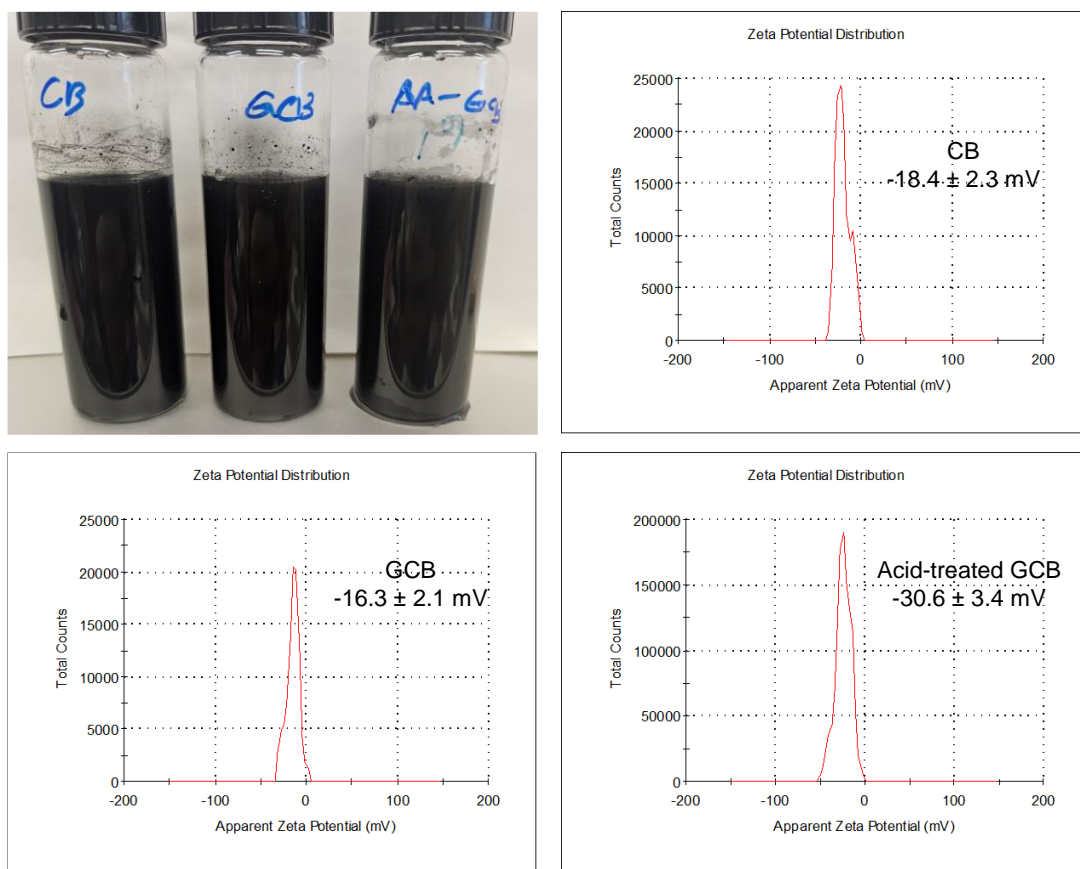

**Figure S2.** Digital photo and zeta potential of CB, GCB, and acid-treated GCB (20 mg) in 30 mL water.

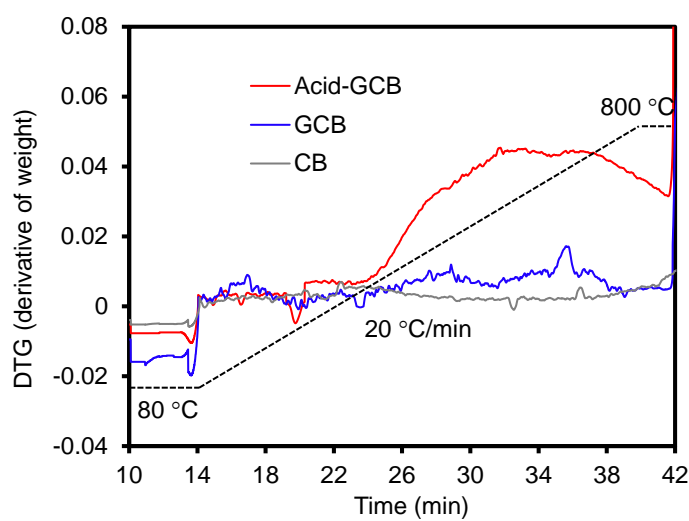

**Figure S3.** Derivative TGA curves of CB, GCB, and acid-treated GCB as a function of time.

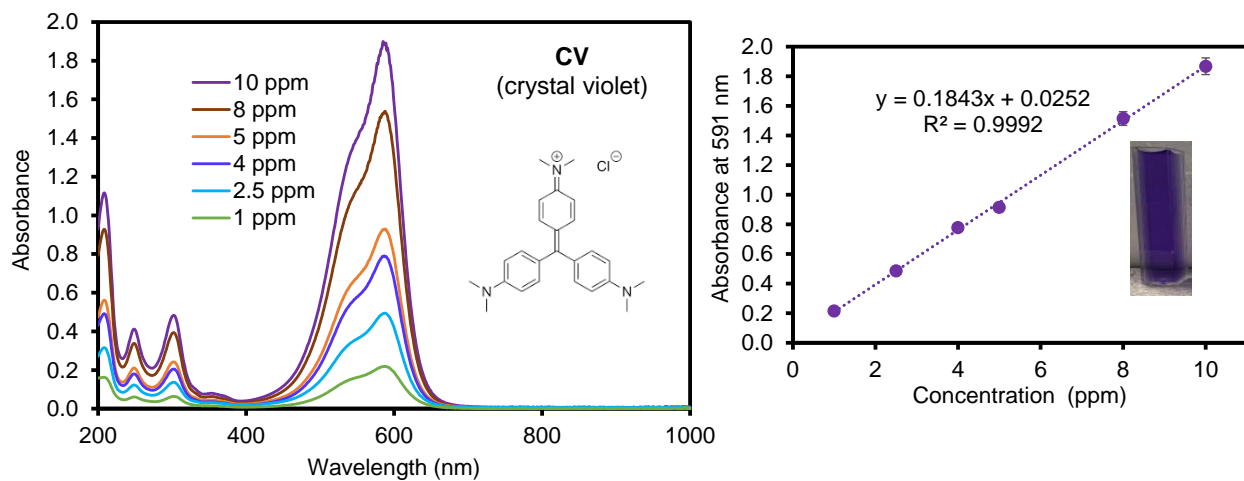

**Figure S4.** UV-Vis spectra of CV as a function of concentration and the corresponding calibration curve.

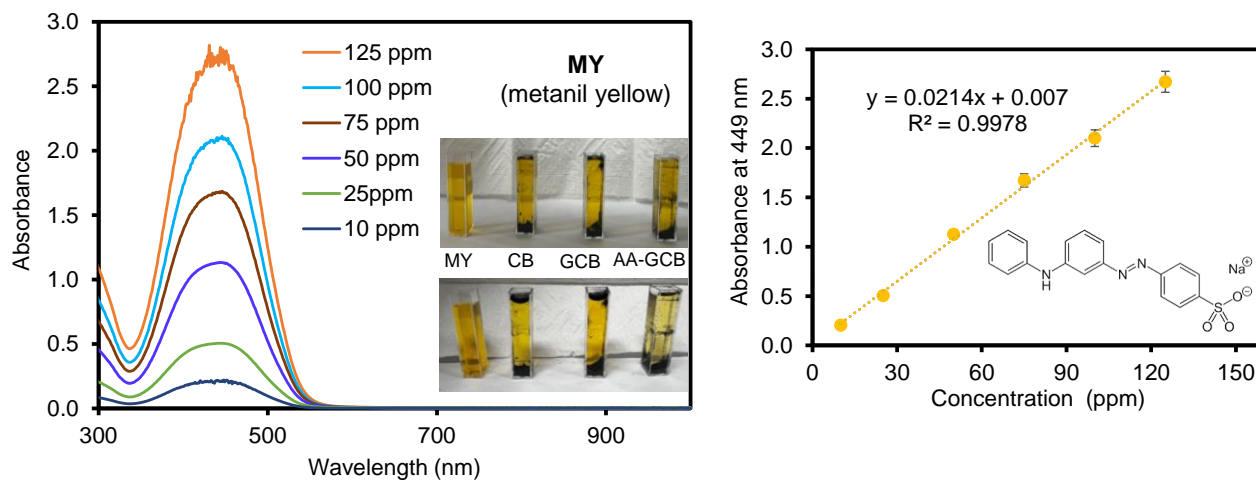

**Figure S5.** UV-Vis spectra of MY as a function of concentration and the corresponding calibration curves (digital photos show the dye solutions before and after treatment with CB-based adsorbents overnight).

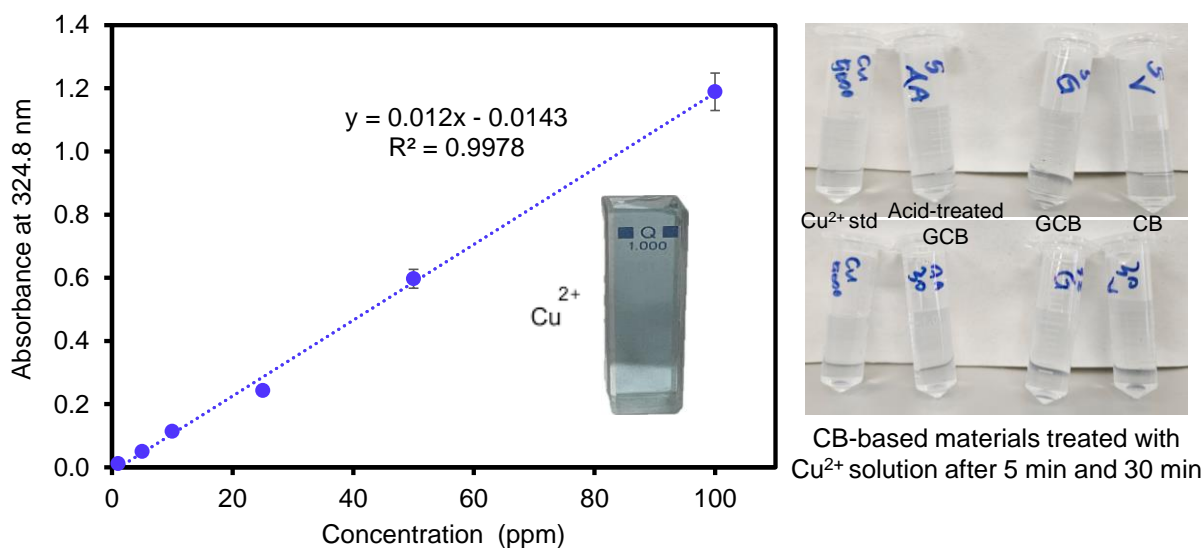

**Figure S6.** Calibration curve of Cu<sup>2+</sup> ions obtained by atomic absorption spectroscopy (AAS) and the representative Cu<sup>2+</sup> solution after the treatment with CB-based adsorbents.

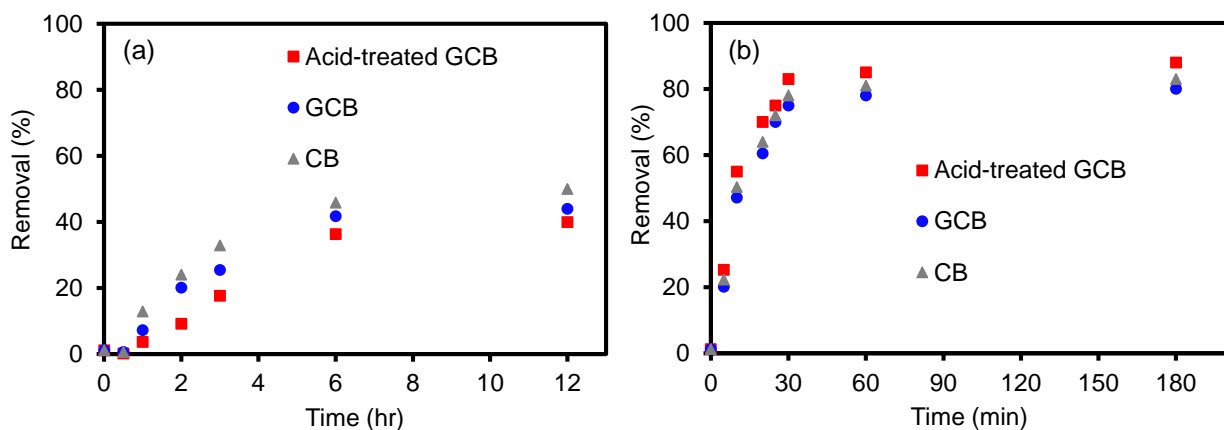

**Figure S7.** Removal (%) of MY (a) and Cu<sup>2+</sup> (b) using CB, GCB, and acid-treated GCB (0.03 g) as a function of time.

**Table S1.** Specific surface area ( $S_{\text{BET}}$ ), pore volume, and pore size analysis of CB, GCB, and acetic acid-treated GCB via  $\text{N}_2$  gas adsorption-desorption isotherms.

| CB                                                                                    |  | Volume/Area summary         |
|---------------------------------------------------------------------------------------|--|-----------------------------|
|                                                                                       |  | <u>Surface Area Data</u>    |
| MultiPoint BET.....                                                                   |  | 5.297e+01 m <sup>2</sup> /g |
| BJH method cumulative adsorption surface area.....                                    |  | 4.636e+01 m <sup>2</sup> /g |
| BJH method cumulative desorption surface area.....                                    |  | 7.065e+01 m <sup>2</sup> /g |
| t-method external surface area.....                                                   |  | 5.297e+01 m <sup>2</sup> /g |
| DFT cumulative surface area.....                                                      |  | 5.018e+01 m <sup>2</sup> /g |
|                                                                                       |  | <u>Pore Volume Data</u>     |
| Total pore volume for pores with Diameter less than 234.66 nm at P/Po = 0.991766..... |  | 4.412e-01 cc/g              |
| BJH method cumulative adsorption pore volume.....                                     |  | 4.373e-01 cc/g              |
| BJH method cumulative desorption pore volume.....                                     |  | 4.374e-01 cc/g              |
| DFT method cumulative pore volume.....                                                |  | 1.536e-01 cc/g              |
|                                                                                       |  | <u>Pore Size Data</u>       |
| Average pore Diameter.....                                                            |  | 3.331e+01 nm                |
| BJH method adsorption pore Diameter (Mode Dv(d)).....                                 |  | 3.410e+00 nm                |
| BJH method desorption pore Diameter (Mode Dv(d)).....                                 |  | 3.051e+00 nm                |
| DFT pore Diameter (Mode).....                                                         |  | 2.600e+00 nm                |

  

| GCB                                                                                   |  | Volume/Area summary         |
|---------------------------------------------------------------------------------------|--|-----------------------------|
|                                                                                       |  | <u>Surface Area Data</u>    |
| MultiPoint BET.....                                                                   |  | 8.664e+01 m <sup>2</sup> /g |
| BJH method cumulative adsorption surface area.....                                    |  | 6.280e+01 m <sup>2</sup> /g |
| BJH method cumulative desorption surface area.....                                    |  | 8.590e+01 m <sup>2</sup> /g |
| t-method external surface area.....                                                   |  | 8.664e+01 m <sup>2</sup> /g |
| DFT cumulative surface area.....                                                      |  | 7.156e+01 m <sup>2</sup> /g |
|                                                                                       |  | <u>Pore Volume Data</u>     |
| Total pore volume for pores with Diameter less than 292.08 nm at P/Po = 0.993400..... |  | 5.611e-01 cc/g              |
| BJH method cumulative adsorption pore volume.....                                     |  | 5.464e-01 cc/g              |
| BJH method cumulative desorption pore volume.....                                     |  | 5.427e-01 cc/g              |
| DFT method cumulative pore volume.....                                                |  | 2.728e-01 cc/g              |
|                                                                                       |  | <u>Pore Size Data</u>       |
| Average pore Diameter.....                                                            |  | 2.591e+01 nm                |
| BJH method adsorption pore Diameter (Mode Dv(d)).....                                 |  | 3.408e+00 nm                |
| BJH method desorption pore Diameter (Mode Dv(d)).....                                 |  | 3.055e+00 nm                |
| DFT pore Diameter (Mode).....                                                         |  | 3.324e+01 nm                |

## 0.1 M Acid-GCB

## Volume/Area summary

## Surface Area Data

|                                                    |                             |
|----------------------------------------------------|-----------------------------|
| MultiPoint BET.....                                | 1.182e+02 m <sup>2</sup> /g |
| BJH method cumulative adsorption surface area..... | 9.602e+01 m <sup>2</sup> /g |
| BJH method cumulative desorption surface area..... | 1.231e+02 m <sup>2</sup> /g |
| t-method external surface area.....                | 1.182e+02 m <sup>2</sup> /g |
| DFT cumulative surface area.....                   | 1.016e+02 m <sup>2</sup> /g |

## Pore Volume Data

|                                                                                          |                |
|------------------------------------------------------------------------------------------|----------------|
| Total pore volume for pores with Diameter<br>less than 317.46 nm at P/Po = 0.993932..... | 5.599e-01 cc/g |
| BJH method cumulative adsorption pore volume.....                                        | 5.442e-01 cc/g |
| BJH method cumulative desorption pore volume.....                                        | 5.469e-01 cc/g |
| DFT method cumulative pore volume.....                                                   | 3.593e-01 cc/g |

## Pore Size Data

|                                                       |              |
|-------------------------------------------------------|--------------|
| Average pore Diameter.....                            | 1.895e+01 nm |
| BJH method adsorption pore Diameter (Mode Dv(d))..... | 3.409e+00 nm |
| BJH method desorption pore Diameter (Mode Dv(d))..... | 3.053e+00 nm |
| DFT pore Diameter (Mode).....                         | 2.000e+00 nm |

## 0.2 M Acid-GCB

## Volume/Area summary

## Surface Area Data

|                                                    |                             |
|----------------------------------------------------|-----------------------------|
| MultiPoint BET.....                                | 1.021e+02 m <sup>2</sup> /g |
| BJH method cumulative adsorption surface area..... | 9.624e+01 m <sup>2</sup> /g |
| BJH method cumulative desorption surface area..... | 1.146e+02 m <sup>2</sup> /g |
| t-method external surface area.....                | 1.021e+02 m <sup>2</sup> /g |
| DFT cumulative surface area.....                   | 9.104e+01 m <sup>2</sup> /g |

## Pore Volume Data

|                                                                                          |                |
|------------------------------------------------------------------------------------------|----------------|
| Total pore volume for pores with Diameter<br>less than 308.81 nm at P/Po = 0.993761..... | 5.340e-01 cc/g |
| BJH method cumulative adsorption pore volume.....                                        | 5.290e-01 cc/g |
| BJH method cumulative desorption pore volume.....                                        | 5.214e-01 cc/g |
| DFT method cumulative pore volume.....                                                   | 3.465e-01 cc/g |

## Pore Size Data

|                                                       |              |
|-------------------------------------------------------|--------------|
| Average pore Diameter.....                            | 2.092e+01 nm |
| BJH method adsorption pore Diameter (Mode Dv(d))..... | 3.824e+00 nm |
| BJH method desorption pore Diameter (Mode Dv(d))..... | 3.410e+00 nm |
| DFT pore Diameter (Mode).....                         | 2.600e+00 nm |

## 0.5 M Acid-GCB

## Volume/Area summary

## Surface Area Data

|                                                    |                             |
|----------------------------------------------------|-----------------------------|
| MultiPoint BET.....                                | 1.195e+02 m <sup>2</sup> /g |
| BJH method cumulative adsorption surface area..... | 1.120e+02 m <sup>2</sup> /g |
| BJH method cumulative desorption surface area..... | 1.357e+02 m <sup>2</sup> /g |
| t-method external surface area.....                | 1.195e+02 m <sup>2</sup> /g |
| DFT cumulative surface area.....                   | 1.039e+02 m <sup>2</sup> /g |

## Pore Volume Data

|                                                                                          |                |
|------------------------------------------------------------------------------------------|----------------|
| Total pore volume for pores with Diameter<br>less than 307.01 nm at P/Po = 0.993724..... | 6.127e-01 cc/g |
| BJH method cumulative adsorption pore volume.....                                        | 6.108e-01 cc/g |
| BJH method cumulative desorption pore volume.....                                        | 6.023e-01 cc/g |
| DFT method cumulative pore volume.....                                                   | 4.185e-01 cc/g |

## Pore Size Data

|                                                       |              |
|-------------------------------------------------------|--------------|
| Average pore Diameter.....                            | 2.051e+01 nm |
| BJH method adsorption pore Diameter (Mode Dv(d))..... | 3.415e+00 nm |
| BJH method desorption pore Diameter (Mode Dv(d))..... | 3.408e+00 nm |
| DFT pore Diameter (Mode).....                         | 2.838e+00 nm |

**Table S2.** Langmuir and Freundlich isotherm parameters for the removal of CV using CB, GCB, and acid-treated GCB (0.5 M).

|            | Parameters        | CB                   | GCB                  | Acid-treated GCB     |
|------------|-------------------|----------------------|----------------------|----------------------|
| Langmuir   | $q_{\max}$ (mg/g) | 181.8                | 161.3                | 312.5                |
|            | $K_L$ (L/mg)      | 21.3                 | 23.8                 | 30.9                 |
|            | $R_L$             | $5.9 \times 10^{-3}$ | $4.2 \times 10^{-3}$ | $4.0 \times 10^{-4}$ |
|            | $R^2$             | 0.971                | 0.983                | 0.989                |
| Freundlich | $K_f$             | 12.08                | 10.31                | 14.56                |
|            | $1/n$             | 0.6531               | 0.640                | 0.677                |
|            | $R^2$             | 0.958                | 0.980                | 0.983                |
